# Supplementary material for: Evolved structure of language shows lineage-specific trends in word-order universals
Source: Springer Nature journal article supplement (doi:10.1038/nature09923), 2011-04-12
Supplement: nature09923-s1.pdf [file nature09923-s1.pdf]

Browse Articles
| Nature


Skip to main content

Thank you for visiting nature.com. You are using a browser version with limited support for CSS. To obtain
the best experience, we recommend you use a more up to date browser (or turn off compatibility mode in
Internet Explorer). In the meantime, to ensure continued support, we are displaying the site without styles
and JavaScript.

Advertisement


- View all journals
- Search
- Log in

- Explore content
- About the journal
- Publish with us
- Subscribe

- Sign up for alerts
- RSS feed


1. nature
2. browse articles

# Browse Articles

## Filter By:

Article Type

All

- All
- Article (23208)
- Book Review (21169)
- Books & Arts (2987)
- Books Received (28076)
- Correspondence (11980)
- Editorial (4209)
- Erratum (1641)
- Letter (120287)
- Matters Arising (1725)
- Miscellany (7852)
- News (104875)
- News & Views (40712)
- News Feature (2416)
- News in Brief (1760)
- Obituary (7011)
- Opinion (5080)
- Research Highlight (2436)
- Research Highlights (4493)
- Scientific Correspondence (4028)
- Supplement to Nature (1556)

Year

All

- All
- 2024 (1749)
- 2023 (4320)
- 2022 (4104)
- 2021 (3737)
- 2020 (3623)
- 2019 (3979)
- 2018 (3934)
- 2017 (3696)
- 2016 (3903)
- 2015 (4056)
- 2014 (4078)
- 2013 (4119)
- 2012 (4260)
- 2011 (4115)
- 2010 (4173)
- 2009 (4396)
- 2008 (4681)
- 2007 (4089)
- 2006 (4072)
- 2005 (4066)

- ### I study artefacts left in prehistoric caves

  Basran Burhan helped to date the oldest piece of figurative art discovered so far.

  - James Mitchell Crow

  Where I Work27 May 2024
- ### Researcher parents are paying a high price for conference travel — here’s how to fix it

  Three scientist mothers call for a change in how conference childcare costs are reimbursed, drawing on their personal experiences.

  - Laura Carter
  - Laura Wolz
  - Laura J. Pallett

  Career Column27 May 2024
- ### How artificial intelligence is helping to identify global inequalities

  Machine learning tools are helping researchers understand how income is distributed and progress towards reducing inequality.

  - Dom Byrne

  Nature Careers Podcast27 May 2024
- ### Tackling ‘wicked’ problems calls for engineers with social responsibility

  Many technologies are high-risk, and their problems cannot be fixed by policy alone; engineers must embrace social responsibility.

  - Susan Krumdieck

  Book Review27 May 2024
- ### Author Correction: Bitter taste receptor activation by cholesterol and an intracellular tastant

  - Yoojoong Kim
  - Ryan H. Gumpper
  - Bryan L. Roth

  Author Correction24 May 2024
- ### Audio long read: How does ChatGPT ‘think’? Psychology and neuroscience crack open AI large language models

  To understand the 'brains' of LLMs, researchers are attempting to reverse-engineering artificial intelligence systems.

  - Matthew Hutson
  - Benjamin Thompson

  Nature Podcast24 May 2024
- ### Ozempic keeps wowing: trial data show benefits for kidney disease

  Semaglutide, the same compound in obesity drug Wegovy, slashes risk of kidney failure and death for people with diabetes.

  - Rachel Fairbank

  News24 May 2024
- ### Software tools identify forgotten genes

  Find My Understudied Genes and the Unknome database highlight interesting genes that have been neglected by science.

  - Matthew Hutson

  Technology Feature24 May 2024
- ### Neanderthal–human baby-making was recent — and brief

  Analysis of dozens of ancient genomes reveals that close encounters between the two species took place in a narrow time window.

  - Michael Eisenstein

  News24 May 2024
- ### The global economy’s 200-year growth spurt — and what comes next

  Can an unlimited supply of innovations and ideas maintain growth without costing the Earth? Yes, a wide-ranging book contends.

  - Rutger Hoekstra

  Book Review24 May 2024
- ### How researchers in remote regions handle the isolation

  Recruitment challenges and limited resources are among the challenges faced by scientists who live and work off the beaten track.

  - Chris Woolston

  Career Feature24 May 2024
- ### What steps to take when funding starts to run out

  Although researchers often face uncertainty when grants expire with no replacement in sight, there are creative ways to ease the dry spell.

  - Neil Savage

  Career Feature24 May 2024
- ### Stereospecific alkenylidene homologation of organoboronates by SNV reaction

  - Miao Chen
  - Christian D. Knox
  - Guangbin Dong

  Article23 May 2024
- ### Publisher Correction: A molecular map of the immune response region from the major histocompatibility complex of the mouse

  - Michael Steinmetz
  - Karyl Minard
  - Leroy Hood

  Publisher Correction23 May 2024
- ### Is that a giant sandwich? No, it’s the biggest protoplanetary disk in the sky

  A colossal object called Dracula’s Chivito, referring to an well-stuffed sandwich popular in Uruguay, is the chunkiest planetary nursery known.

  Research Highlight23 May 2024
- ### Two receptors are better than one for AI-designed obesity drugs

  Compounds predicted by machine learning attach to two receptors involved in appetite and weight.

  Research Highlight23 May 2024
- ### These crows have counting skills previously only seen in people

  The corvids are the first animals other than humans known to produce a deliberate number of calls on command.

  - Mariana Lenharo

  News23 May 2024
- ### A tiny killer is making an entire region’s sea urchins disintegrate

  A single-celled organism is destroying up to 100% of urchins in parts of the Red Sea and the Western Indian Ocean.

  Research Highlight23 May 2024
- ### Superstar porous materials get salty thanks to computer simulations

  Model predicts the structure of previously elusive compounds with practical applications.

  - Ariana Remmel

  News23 May 2024
- ### Daily briefing: Why climate change is making flights rougher

  Severe turbulence such as those that killed one person on a Singapore Airlines flight, could become more frequent with warming temperatures. Plus, promethium is made into a ‘complex’ for the first time and bizarre bacteria defy textbooks by writing new genes.

  - Katrina Krämer

  Nature Briefing23 May 2024

- Previous page
- page 1
- page 2
- page 3
- …
- page 21815
- Next page

## Explore content

- Research articles
- News
- Opinion
- Research Analysis
- Careers
- Books & Culture
- Podcasts
- Videos
- Current issue
- Browse issues
- Collections
- Subjects

- Follow us on Facebook
- Follow us on Twitter
- Subscribe
- Sign up for alerts
- RSS feed


## About the journal

- Journal Staff
- About the Editors
- Journal Information
- Our publishing models
- Editorial Values Statement
- Journal Metrics
- Awards
- Contact
- Editorial policies
- History of Nature
- Send a news tip


## Publish with us

- For Authors
- For Referees
- Language editing services
- Submit manuscript

## Search

Search articles by subject, keyword or author

Show results from

All journals
This journal

Search

Advanced search

### Quick links

- Explore articles by subject
- Find a job
- Guide to authors
- Editorial policies

Nature (*Nature*)

ISSN 1476-4687 (online)

ISSN 0028-0836 (print)

## nature.com sitemap

### About Nature Portfolio

- About us
- Press releases
- Press office
- Contact us

### Discover content

- Journals A-Z
- Articles by subject
- protocols.io
- Nature Index

### Publishing policies

- Nature portfolio policies
- Open access

### Author & Researcher services

- Reprints & permissions
- Research data
- Language editing
- Scientific editing
- Nature Masterclasses
- Research Solutions

### Libraries & institutions

- Librarian service & tools
- Librarian portal
- Open research
- Recommend to library

### Advertising & partnerships

- Advertising
- Partnerships & Services
- Media kits
- Branded
  content

### Professional development

- Nature Careers
- Nature 
  Conferences

### Regional websites

- Nature Africa
- Nature China
- Nature India
- Nature Italy
- Nature Japan
- Nature Middle East

- Privacy
  Policy
- Use
  of cookies
- Your privacy choices/Manage cookies
- Legal
  notice
- Accessibility
  statement
- Terms & Conditions
- Your US state privacy rights

© 2024 Springer Nature Limited

xml version="1.0" encoding="UTF-8"?
